# Supplementary material for: Combining bempegaldesleukin (CD122-preferential IL-2 pathway agonist) and NKTR-262 (TLR7/8 agonist) improves systemic antitumor CD8+ T cell cytotoxicity over BEMPEG+RT
Source: PubMed Central journal article supplement — J Immunother Cancer. 2022 Apr 20;10(4):e004218. doi: 10.1136/jitc-2021-004218 (PMC9021762; doi:10.1136/jitc-2021-004218), 2022-04-20
Supplement: jitc-2021-004218supp010.pdf [file jitc-2021-004218supp010.pdf]

Supplemental Table 1. Statistical comparison of average tumor size on days 13, 17, and 20 post treatment.

| <b>Treatment side (right tumor)</b> |                            |          |        |            |                  |                                    |          |        |            |                              |          |        |
|-------------------------------------|----------------------------|----------|--------|------------|------------------|------------------------------------|----------|--------|------------|------------------------------|----------|--------|
|                                     | <b>Control<sup>#</sup></b> |          |        |            |                  | <b>BEMPEG+NKTR-262<sup>#</sup></b> |          |        |            | <b>BEMPEG+RT<sup>#</sup></b> |          |        |
|                                     | RT                         | NKTR-262 | BEMPEG | BEMPEG +RT | BEMPEG +NKTR-262 | RT                                 | NKTR-262 | BEMEPG | BEMPEG +RT | RT                           | NKTR-262 | BEMPEG |
| <b>13</b>                           | *                          |          |        | **         | *                |                                    |          |        |            |                              |          |        |
| <b>17</b>                           | ***                        | *        | *      | ***        | **               |                                    |          |        |            |                              | **       | *      |
| <b>20</b>                           |                            |          |        |            |                  |                                    |          | *      |            |                              |          | **     |

  

| <b>Non-treatment side (left tumor)</b> |                            |          |        |            |                  |                                    |          |        |            |                              |          |        |
|----------------------------------------|----------------------------|----------|--------|------------|------------------|------------------------------------|----------|--------|------------|------------------------------|----------|--------|
|                                        | <b>Control<sup>#</sup></b> |          |        |            |                  | <b>BEMPEG+NKTR-262<sup>#</sup></b> |          |        |            | <b>BEMPEG+RT<sup>#</sup></b> |          |        |
|                                        | RT                         | NKTR-262 | BEMPEG | BEMPEG +RT | BEMPEG +NKTR-262 | RT                                 | NKTR-262 | BEMEPG | BEMPEG +RT | RT                           | NKTR-262 | BEMPEG |
| <b>13</b>                              |                            |          |        | *          | *                |                                    | ***      |        |            |                              | *        |        |
| <b>17</b>                              |                            |          | *      | **         | **               | *                                  | **       |        |            |                              |          |        |
| <b>20</b>                              |                            |          |        |            |                  | ***                                |          | *      |            |                              |          |        |

<sup>#</sup>Data below these headings (Control, BEMPEG+NKTR-262, BEMPEG+RT) are in comparison to them (ie: BEMPEG is not statistically different from control on day 13, but is by day 17).

Note 1: Statistical analysis could not be performed for day 20 for control or NKTR-262 groups because mice had reached maximum tumor burden and euthanized.

Note 2: All statistics are repeated measures ANOVA with Dunnett's multiple comparisons test.
