# Supplementary material for: Combining bempegaldesleukin (CD122-preferential IL-2 pathway agonist) and NKTR-262 (TLR7/8 agonist) improves systemic antitumor CD8+ T cell cytotoxicity over BEMPEG+RT
Source: PubMed Central journal article supplement — J Immunother Cancer. 2022 Apr 20;10(4):e004218. doi: 10.1136/jitc-2021-004218 (PMC9021762; doi:10.1136/jitc-2021-004218), 2022-04-20
Supplement: jitc-2021-004218supp011.pdf [file jitc-2021-004218supp011.pdf]

**Supplemental Table 2. List of antibodies use for flow cytometry.**

| Location      | Antibody        | Clone       | Source            |
|---------------|-----------------|-------------|-------------------|
|               | Live/dead       | 65-0865-18  | eBio              |
|               | CD45            | 30-F11      | BioLegend         |
|               | CD4             | RM4-5       | BioLegend         |
|               | CD8             | 53-6.7      | BioLegend         |
|               | NKp46           | 29A1.4      | BioLegend         |
|               | ICOS            | C398.4A     | BioLegend         |
|               | PD-1            | 29F.1A12    | BioLegend         |
|               | Tim-3           | RMT3-23     | BioLegend         |
|               | Lag-3           | eBioC9B7W   | eBio              |
|               | OX40            | OX86        | BioLegend         |
|               | CD122           | TM-B1       | BD Biosciences    |
|               | CD25            | PC61.5      | BioLegend         |
|               | CD62L           | MEL14       | eBio              |
| Surface       | AH1-A5 tetramer |             | NIH Tetramer Core |
|               | MHCII           | M5/114.15.2 | eBio              |
|               | CD24            | M1/69       | BD Biosciences    |
|               | F4/80           | BM8         | BioLegend         |
|               | CD11c           | N418        | BioLegend         |
|               | CD11b           | M1/70       | BD Biosciences    |
|               | CD103           | 2E7         | BioLegend         |
|               | CD274 (PD-L1)   | B7-H1       | BioLegend         |
|               | Arg1            |             | R&D Systems       |
|               | Ly6C            | HK1.4       | BioLegend         |
|               | Ly6G            | 1A8         | BD Biosciences    |
|               | 4-1BB           | 17B5        | eBio              |
|               | CD27            | LG.3A10     | BioLegend         |
|               | CTLA-4          | 14D3        | eBio              |
|               | iNos            | CXNFT       | eBio              |
| Intracellular | Granzyme A      | GzA-3G8.5   | Invitrogen        |
|               | FoxP3           | FKJ16a      | eBio              |
|               | Ki-67           | B56         | BD Biosciences    |
|               | IFN-g           | XMG1.2      | BioLegend         |
|               | TNF-a           | TN3-19      | BioLegend         |
