# Supplementary figures and images for: Combining bempegaldesleukin (CD122-preferential IL-2 pathway agonist) and NKTR-262 (TLR7/8 agonist) improves systemic antitumor CD8+ T cell cytotoxicity over BEMPEG+RT
Source: PubMed Central journal article supplement — J Immunother Cancer. 2022 Apr 20;10(4):e004218. doi: 10.1136/jitc-2021-004218 (PMC9021762; doi:10.1136/jitc-2021-004218), 2022-04-20

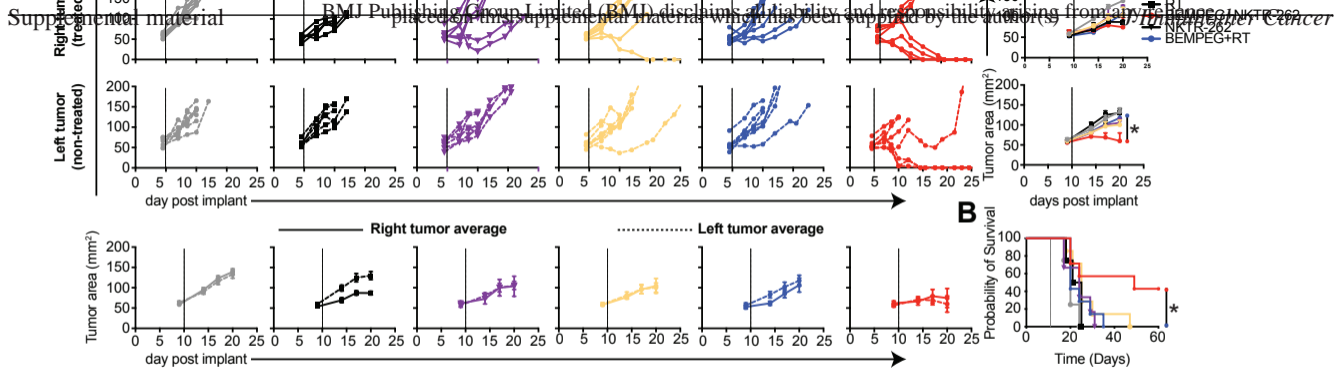

Supplement: jitc-2021-004218supp001.pdf [file jitc-2021-004218supp001.pdf]

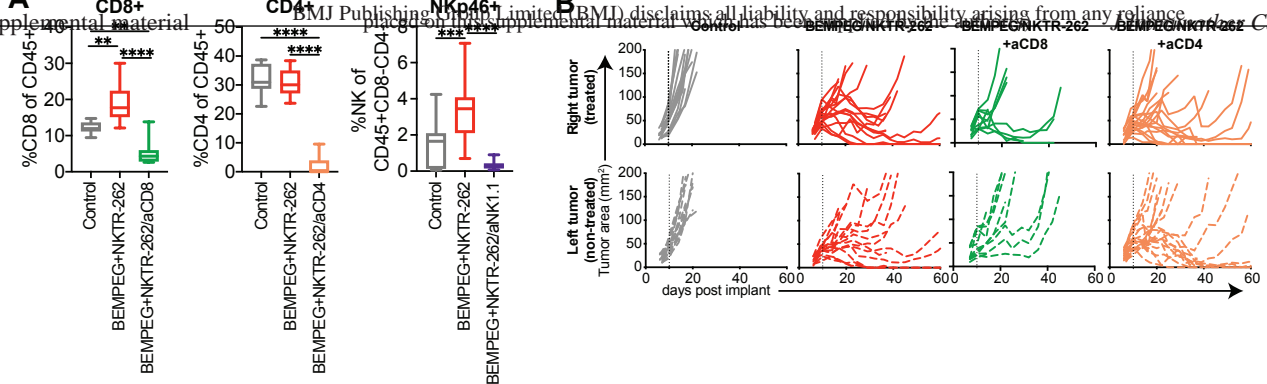

Supplement: jitc-2021-004218supp002.pdf [file jitc-2021-004218supp002.pdf]

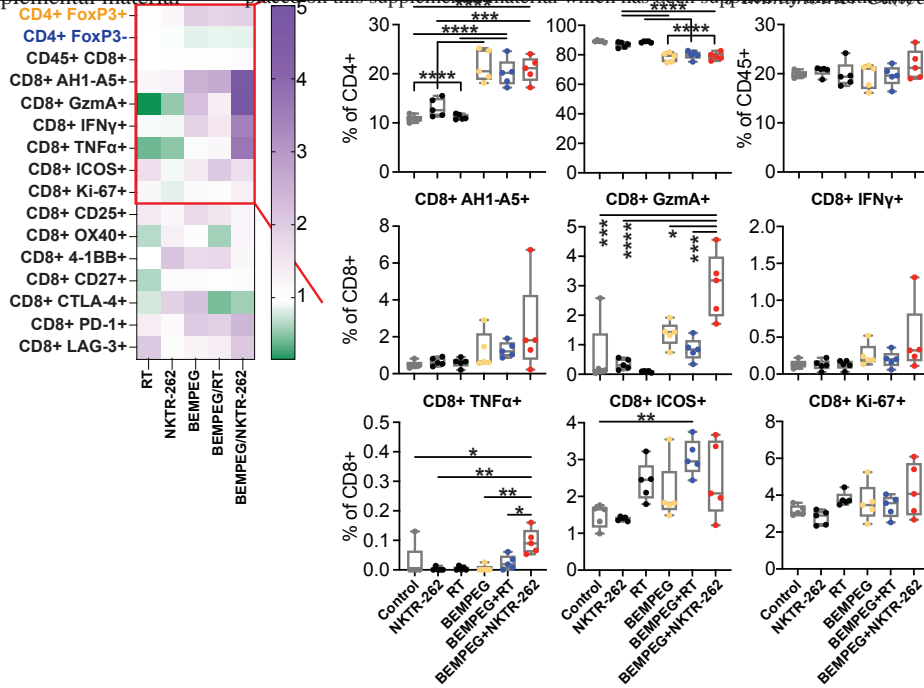

Supplement: jitc-2021-004218supp003.pdf [file jitc-2021-004218supp003.pdf]

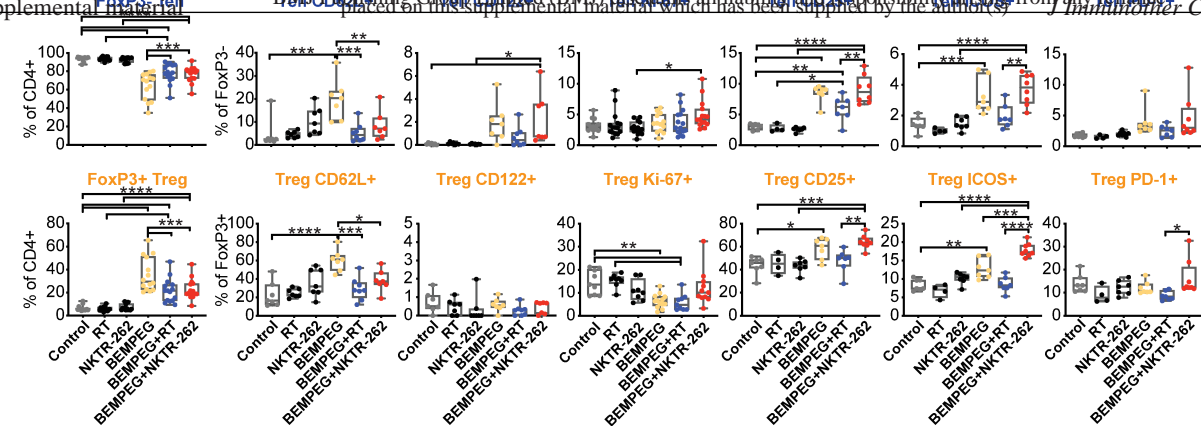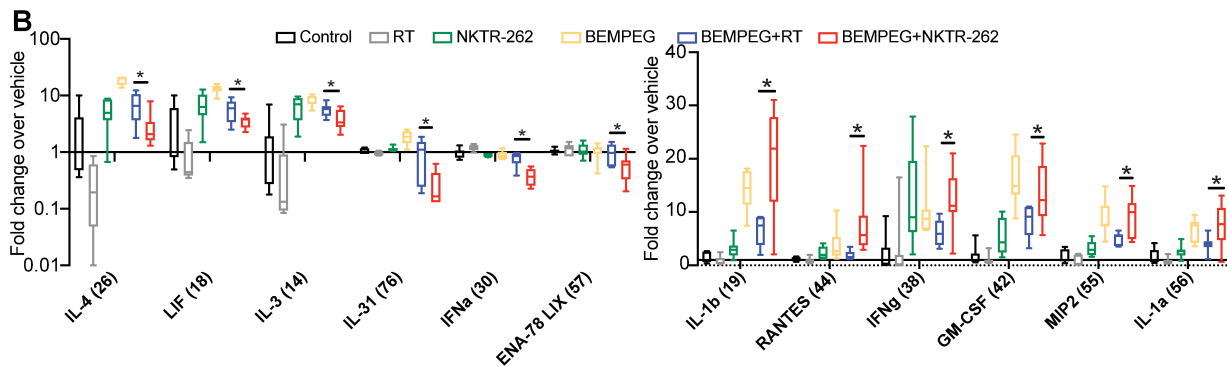

Supplement: jitc-2021-004218supp004.pdf [file jitc-2021-004218supp004.pdf]

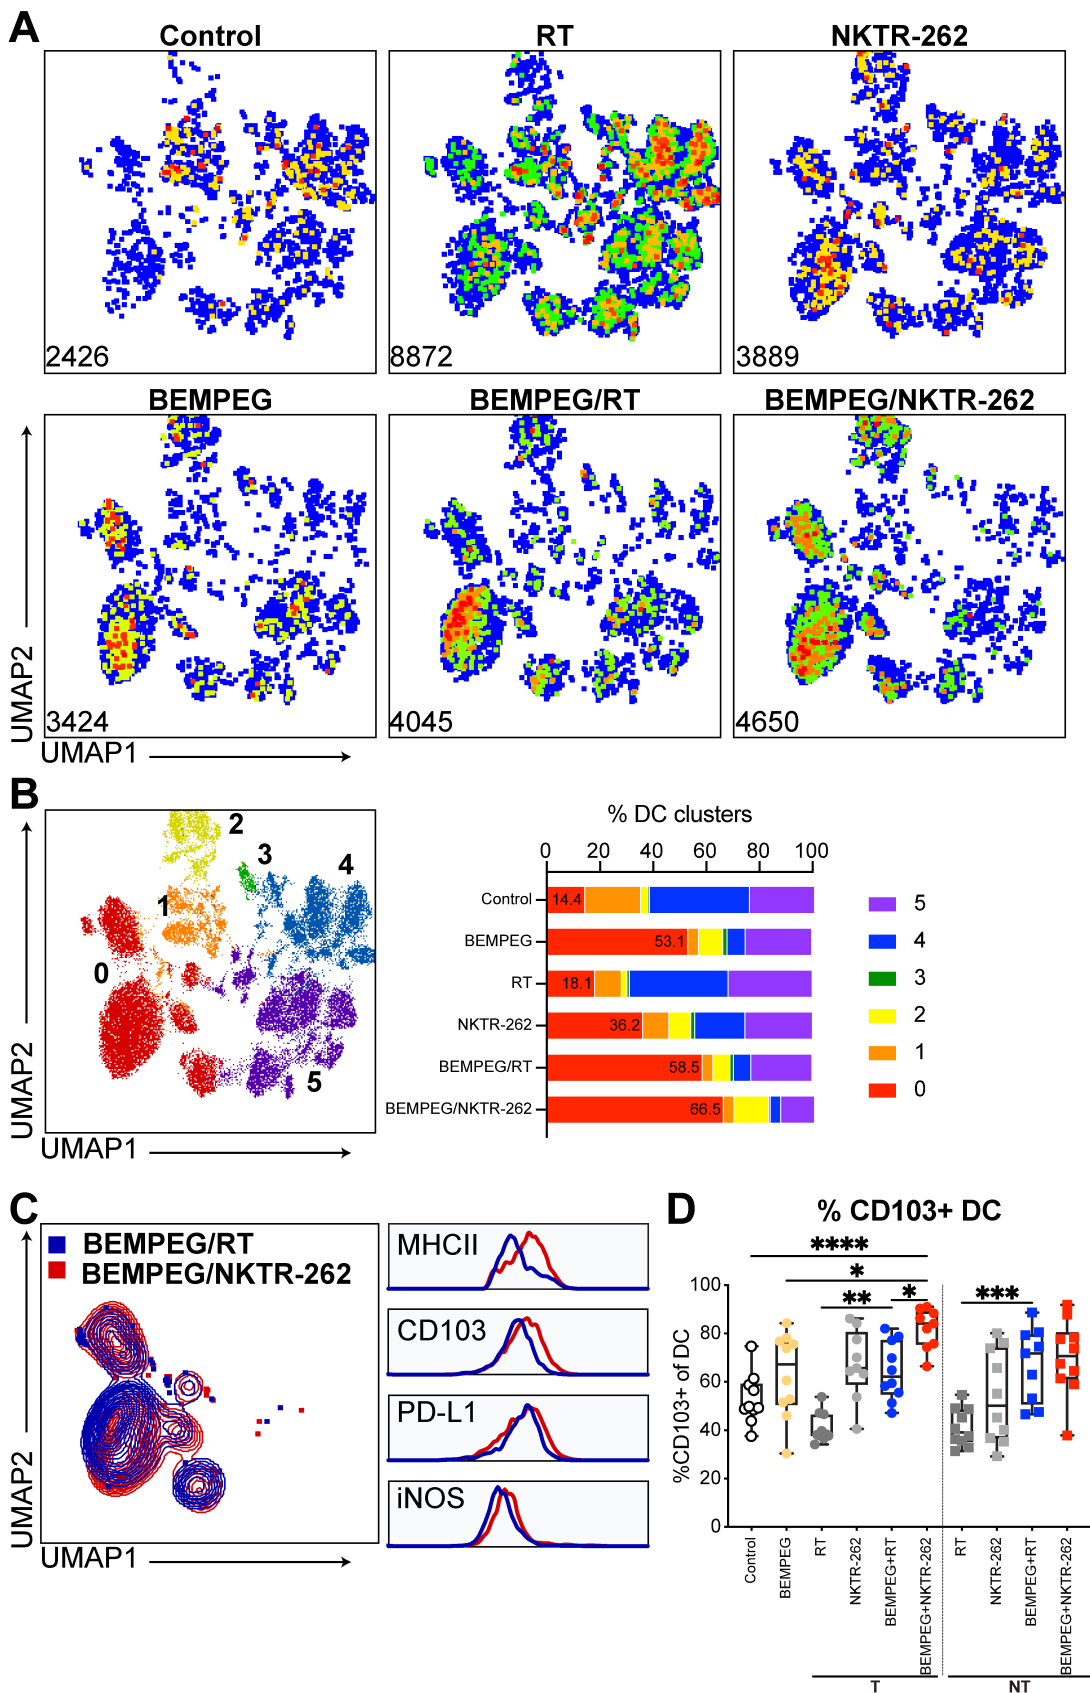

Supplement: jitc-2021-004218supp006.pdf [file jitc-2021-004218supp006.pdf]

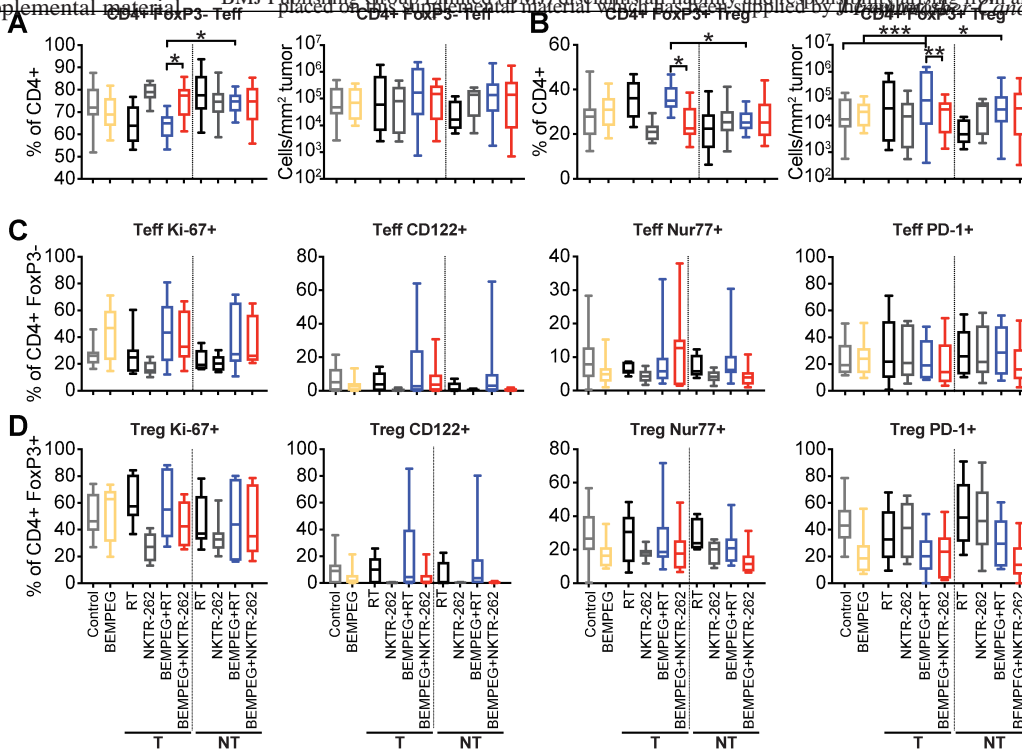

Supplement: jitc-2021-004218supp008.pdf [file jitc-2021-004218supp008.pdf]

Supplemental material

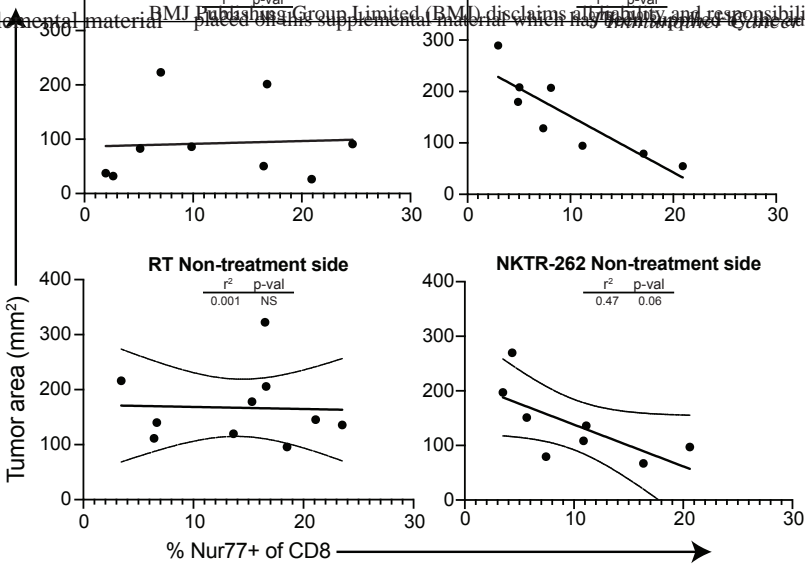

Supplement: jitc-2021-004218supp009.pdf [file jitc-2021-004218supp009.pdf]
